# Supplementary material
Source: publisher site journal article supplement (https://www.spandidos-publications.com/6421/downloadSupplementary)
Supplement: Supplementary file 1 [file downloadSupplementary]

Table SI. Sequences of siRNA.

| Gene name        | Sequence (5'→3')                                                 |
|------------------|------------------------------------------------------------------|
| NOX5-si-1        | Sense: CCUUCUUUGCAGAGCGAUUTT<br>Antisense: AAUCGCUCUGCAAAGAAGGTT |
| NOX5-si-2        | Sense:GCCUGGCAUUGGCUGGGUATT<br>Antisense: UACCCAGCCAAUGCCAGGCTT  |
| Negative control | Sense:UUCUCCGAACGUGUCACGUTT<br>Antisense:ACGUGACACGUUCGGAGAATT   |

si-, small interfering; NOX5, NAPDH oxidase 5.

Table SII. Sequences of primers used for reverse transcription-quantitative PCR.

| Gene name       | Primer sequence (5'→3')       |
|-----------------|-------------------------------|
| NAPDH oxidase 5 | F: CCA GTG CCT CAA CTT CGA CT |
|                 | R: GTA GGA CTT GAG CCA GCC AC |
| GAPDH           | F: TCA AGG CTG AGA ACG GGA AG |
|                 | R: GAC TCC ACG ACG TAC TCA GC |

F, forward; R, reverse.
